# Supplementary material for: Structural characterization of solid trivalent metal dodecyl sulfates: from aqueous solution to lamellar superstructures
Source: Royal Society of Chemistry journal article supplement (doi:10.1039/c2ra21906a), 2012-11-15
Supplement: c2ra21906a.pdf [file c2ra21906a.pdf]

*Supporting Information*

**Structural characterization of solid trivalent metal dodecyl sulfates: from aqueous solution to lamellar superstructures**

Rui F.P. Pereira,<sup>\*,a</sup> Artur J.M. Valente,<sup>a</sup> Hugh D. Burrows,<sup>a</sup> V. de Zea Bermudez,<sup>b</sup> Rui A.

Carvalho,<sup>c</sup> Ricardo A.E. Castro<sup>d</sup>

<sup>a</sup> *Department of Chemistry, University of Coimbra, 3004-535 Coimbra, Portugal*

<sup>b</sup> *Department of Chemistry and CQ-VR, University of Trás-os-Montes e Alto Douro, 5001-801 Vila Real, Portugal*

<sup>c</sup> *Department of Life Sciences and Center for Neurosciences, University of Coimbra, 3004-295 Coimbra, Portugal*

<sup>d</sup> *Faculty of Pharmacy, University of Coimbra, 3004-295 Coimbra, Portugal*

---

\* *E-mail address:* rpereira@qui.uc.pt; Tel:+351-259-350253; fax: +351-259-350480;

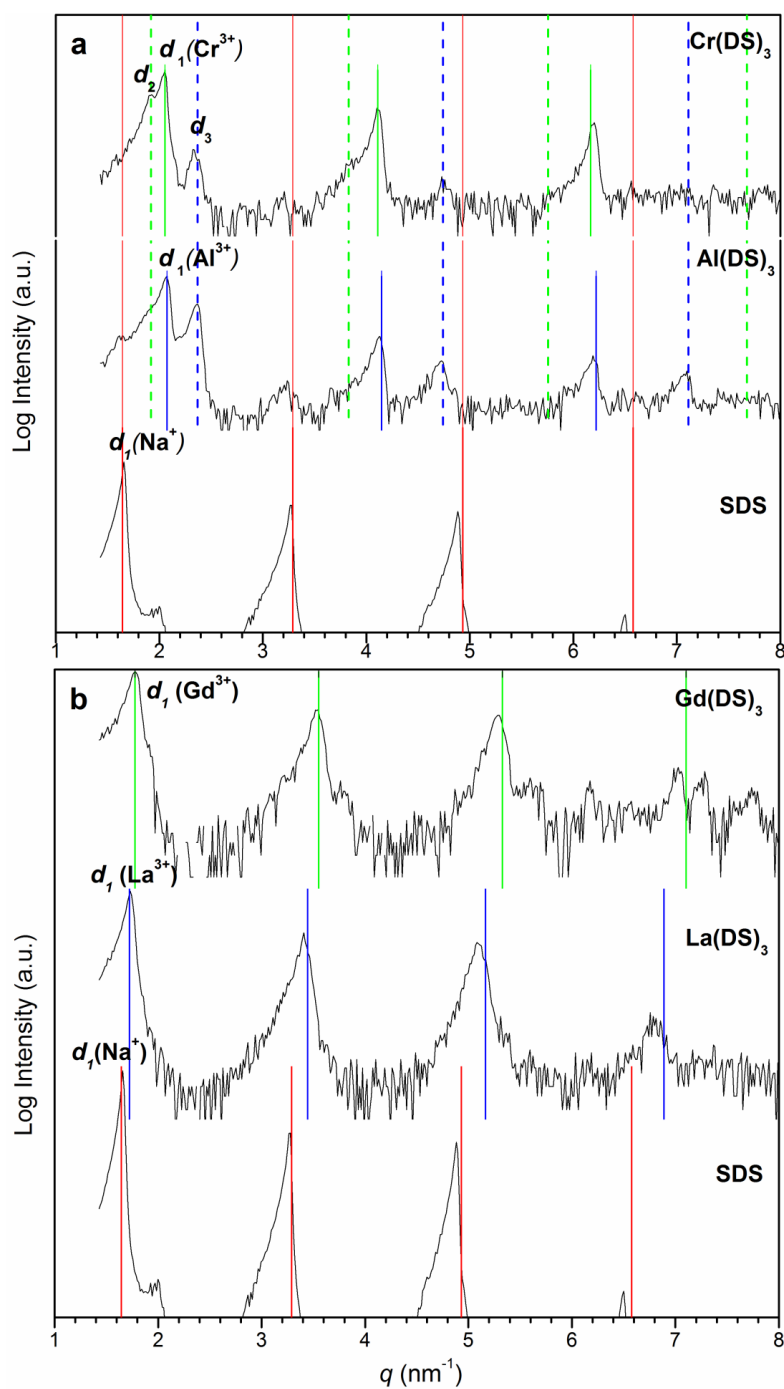

**Fig. S1** XRD patterns of the metal dodecyl sulfate complexes  $M(DS)_n$ .

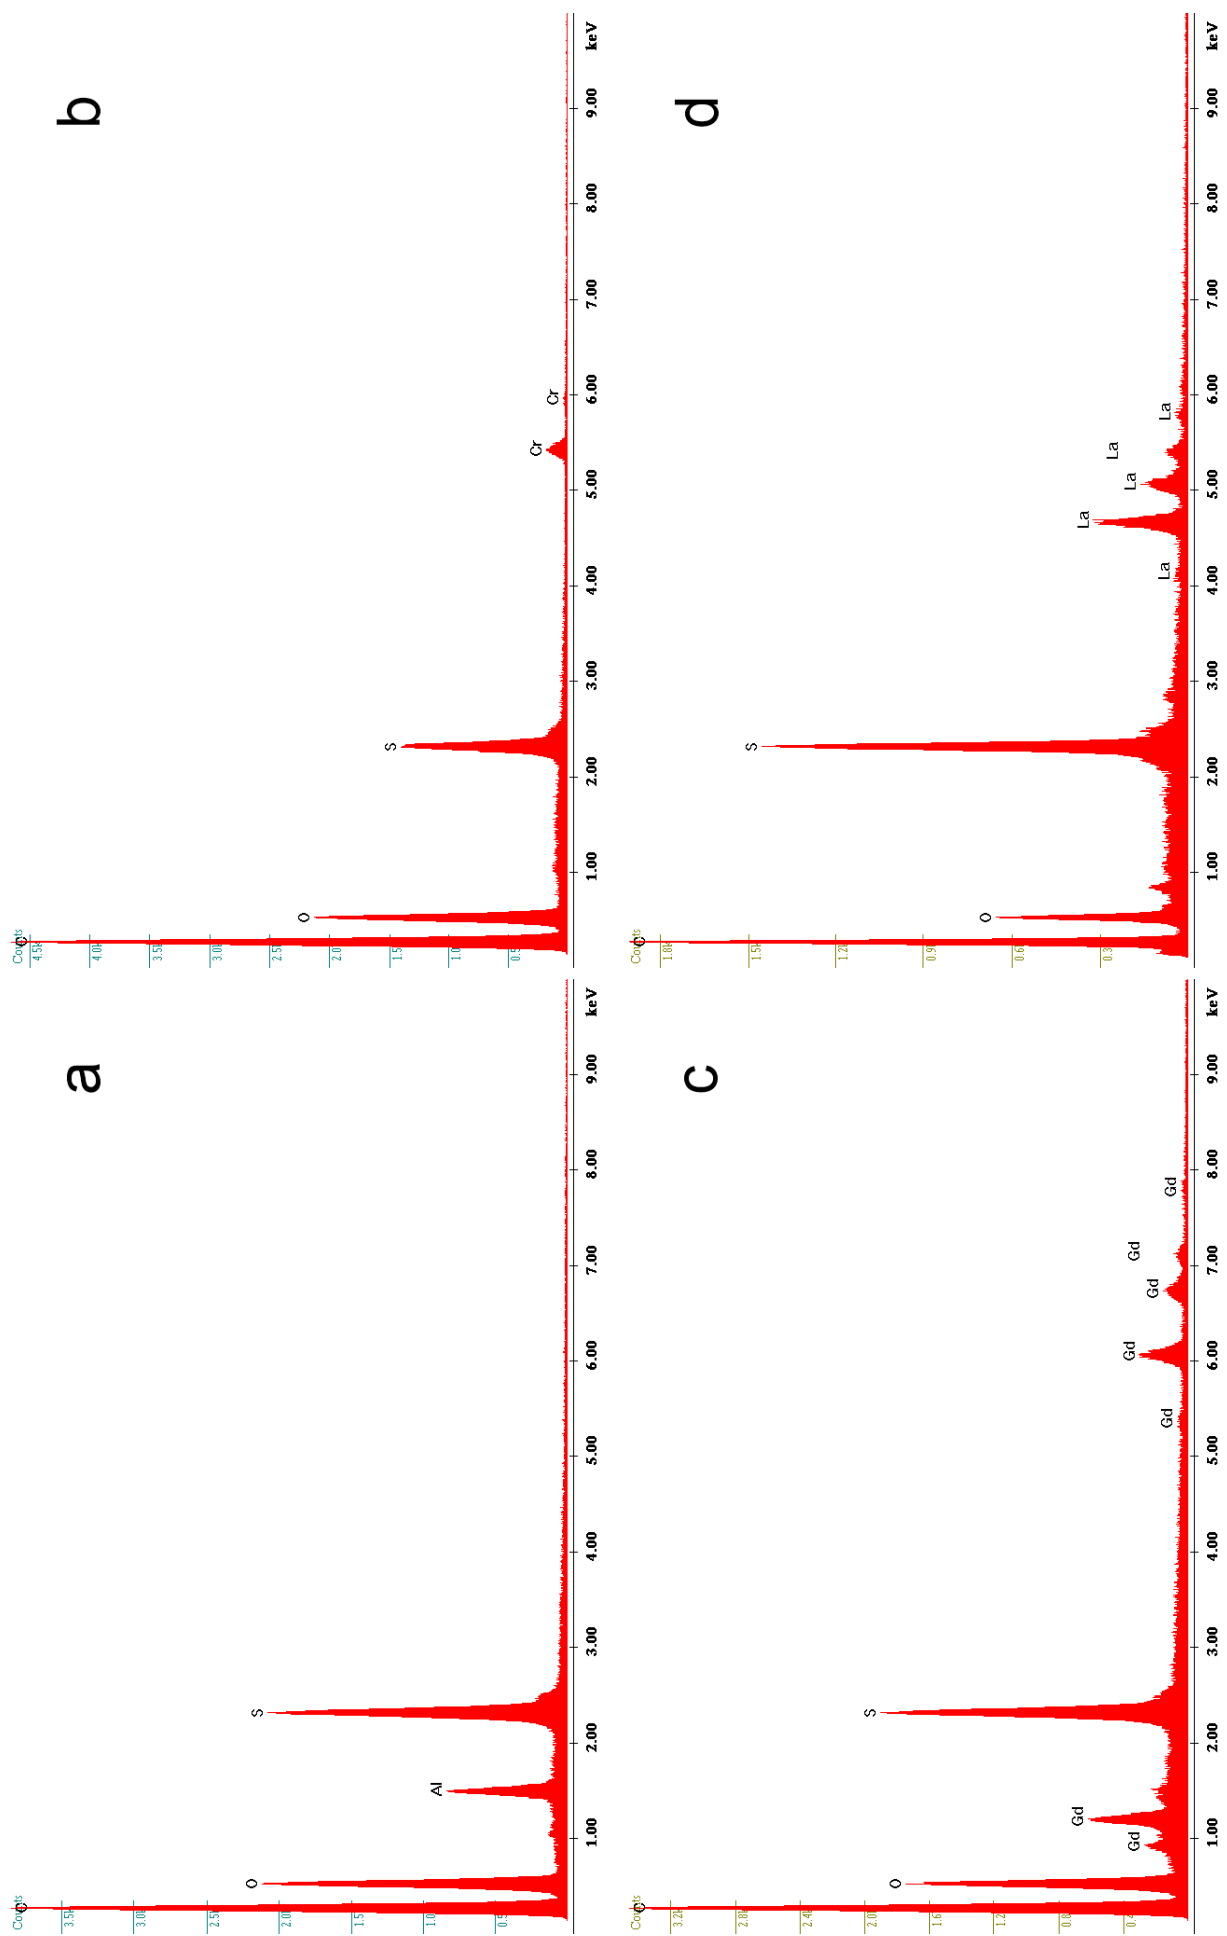

**Fig. S2** EDS spectrum of the Al(DS)<sub>3</sub> (a), Cr(DS)<sub>3</sub> (b), Gd(DS)<sub>3</sub> (c) and La(DS)<sub>3</sub> (d) complexes.

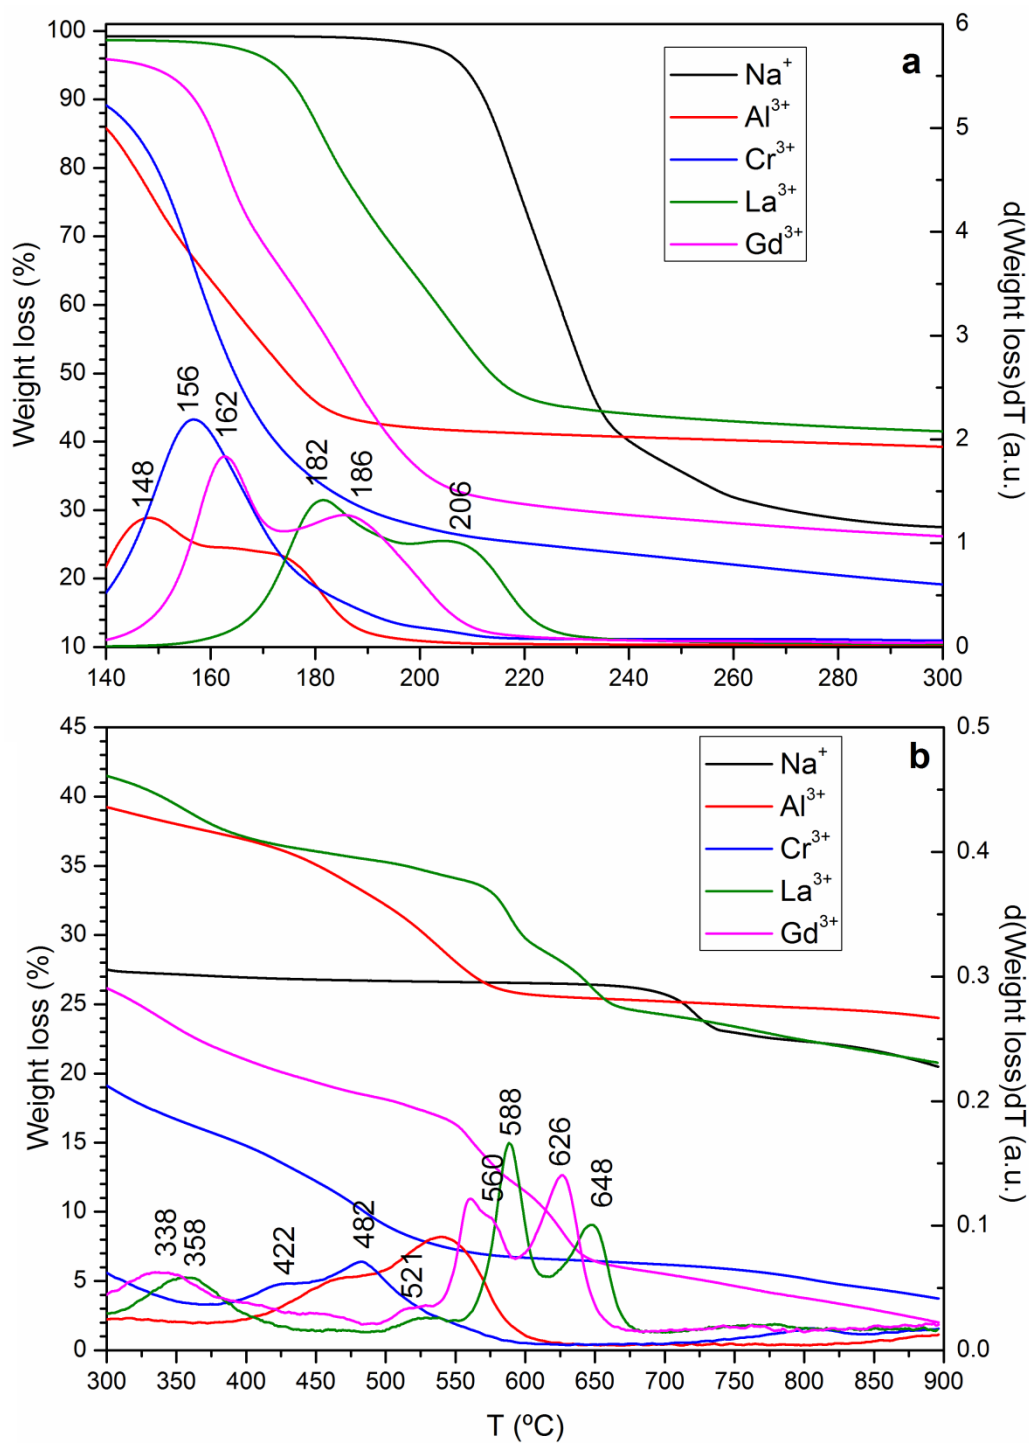

**Fig. S3** TGA curves (left axis) of the metal dodecyl sulfate complexes  $M(\text{DS})_3$  and derivative curves (right axis) corresponding to Regions II (a) and III (b) of the plot of Fig. 7.

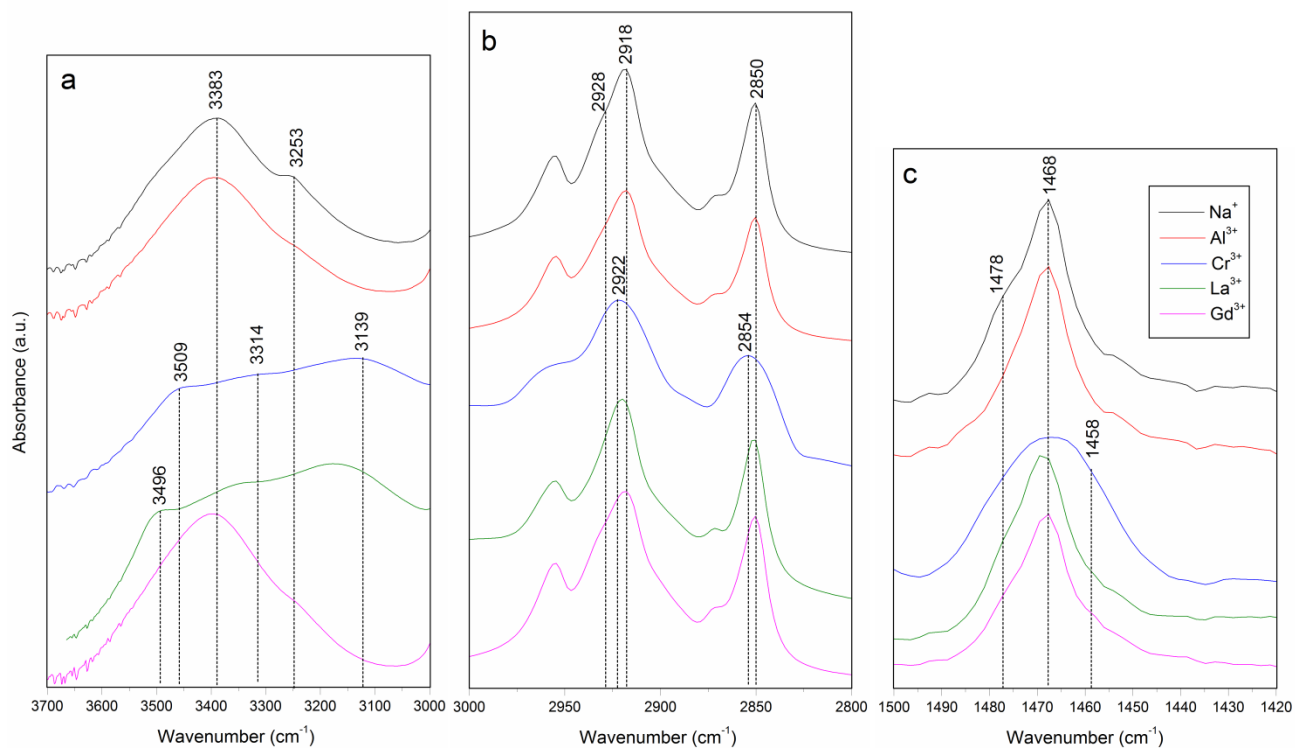

**Fig. S4** FT-IR spectra of the metal dodecyl sulfate complexes  $M(DS)_n$ : in the  $\nu OH$  (a),  $\nu_s CH_2$  and  $\nu_a CH_2$  (b) and  $\delta CH_2$  (c) regions.

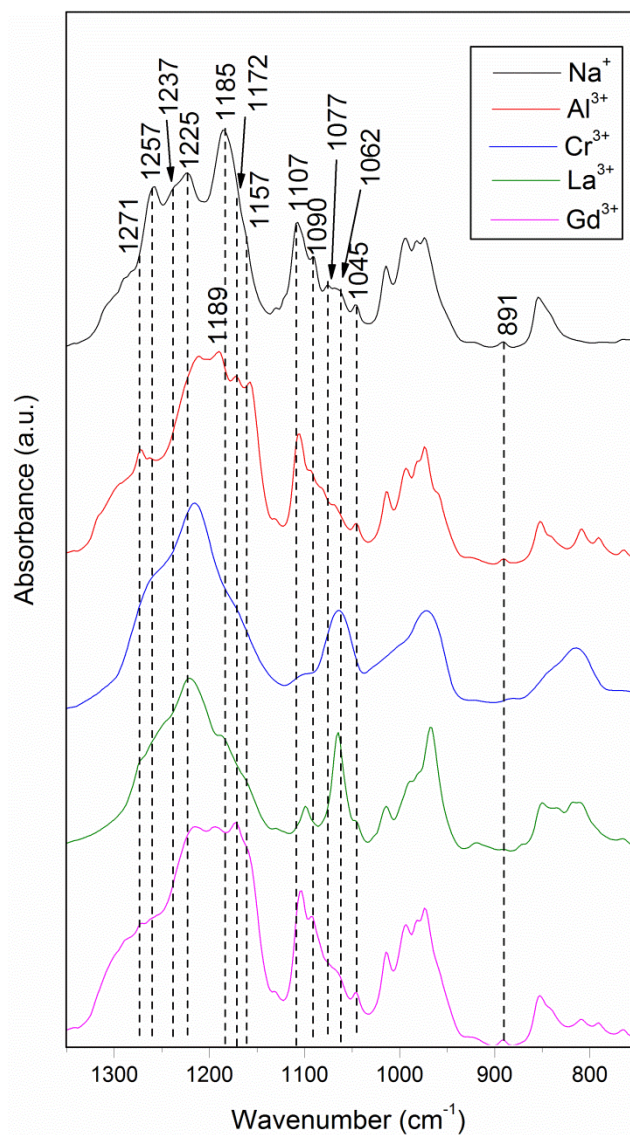

**Fig. S5** FT-IR spectra of the metal dodecyl sulfate complexes  $M(DS)_n$  in vC-C and sulfate regions.

### *Interpretation of FT-IR spectra for the sulfate group vibrations*

Examination of the characteristic bands of the  $\text{SO}_4^{2-}$  ion in the FT-IR spectra of  $\text{SDS}\cdot 0.1\text{H}_2\text{O}$ ,  $\text{Al}(\text{DS})_3\cdot 4.1\text{H}_2\text{O}$ ,  $\text{Cr}(\text{DS})_3\cdot 3.2\text{H}_2\text{O}$ ,  $\text{La}(\text{DS})_3\cdot 0.7\text{H}_2\text{O}$  and  $\text{Gd}(\text{DS})_3\cdot 2.0\text{H}_2\text{O}$  is important to elucidate the interactions established by the dodecyl sulfate headgroup in each of these compounds. The attribution of the infrared spectrum of the sulfate ion is well established.<sup>82, 83</sup> In aqueous solution, the “free” sulfate ion belongs to the tetrahedral  $T_d$  point group. For this symmetry only one broad vibration band, associated with the triply degenerate asymmetric stretching  $\nu_3$  vibration mode (henceforth designated as  $\nu_a\text{SO}_4$ ), is infrared active, being located at approximately  $1102\text{ cm}^{-1}$ . In outer-sphere sulfate complexes, in which the  $\text{SO}_4^{2-}$  ion does not belong to the 1<sup>st</sup> coordination sphere of the metal, distortion due to electrostatic effects may upshift the  $\nu_a\text{SO}_4$  mode. In addition the  $\nu_1$  band, ascribed to the non-degenerate symmetric stretching vibration mode and henceforth referred as  $\nu_s\text{SO}_4$ , may become infrared active, appearing as a weak band at about  $980\text{ cm}^{-1}$ . In the case of inner-sphere sulfate complexes, *i.e.*, those in which the 1<sup>st</sup> coordination shell of the metal comprises the  $\text{SO}_4^{2-}$  ligand, the symmetry of the anion is lowered and the degeneracy of the  $\nu_a\text{SO}_4$  mode is lifted. In the case of monodentate bonding occurring via coordination to a metal ( $\text{M-OSO}_3$ ) or through protonation ( $\text{H}\cdots\text{OSO}_3^-$  or simply  $\text{HSO}_4^-$ ) ( $C_{3v}$  symmetry) the  $\nu_a\text{SO}_4$  band splits into two bands and the  $\nu_s\text{SO}_4$  band emerges fully active at about  $975\text{ cm}^{-1}$ . If the  $\text{SO}_4^{2-}$  ion adopts bidentate configuration (binuclear  $(\text{M-O})_2\text{SO}_2$  or bridging  $\text{M-O}_2\text{SO}_2$ ), the symmetry is further lowered to  $C_{2v}$  and, as a consequence, the  $\nu_a\text{SO}_4$  mode splits into three bands ranging between  $1050$  and  $1250\text{ cm}^{-1}$ , whereas the  $\nu_s\text{SO}_4$  band is shifted to approximately  $1000\text{ cm}^{-1}$ .
